# Supplementary material for: Association between sleep quality and type 2 diabetes at 20-year follow-up in the Southall and Brent REvisited (SABRE) cohort: a triethnic analysis
Source: HighWire-hosted journal article supplement (doi:10.1136/jech-2020-215796), 2021-06-11
Supplement: jech-2020-215796supp001_data_supplement.pdf [file jech-2020-215796supp001_data_supplement.pdf]

Electronic Supplementary Materials (ESM)

**ESM-1**— Overall and ethnicity-stratified analysis of the association between the composite sleep quality variable and type-2 diabetes risk reported in hazard ratios (95%CI), complete case analysis (n=2189)

| Sleep variable     | Person-years followed-up |      |       | Hazard ratio        |                     |                     |                         |
|--------------------|--------------------------|------|-------|---------------------|---------------------|---------------------|-------------------------|
| z_wSleep           | Type-2 diabetes          |      | Total | Model 1             | Model 2             | Model 3             | P-value for interaction |
|                    | No                       | Yes  |       |                     |                     |                     |                         |
| All                | 30863                    | 6509 | 37372 | 1.03<br>(0.94-1.13) | 1.02<br>(0.93-1.11) | 1.00<br>(0.92-1.10) | -                       |
| Europeans          | 18488                    | 2427 | 20915 | 1.04<br>(0.88-1.22) | 1.02<br>(0.87-1.20) | 1.01<br>(0.86-1.18) | -                       |
| South-Asians       | 8862                     | 3062 | 11924 | 1.06<br>(0.94-1.20) | 1.02<br>(0.90-1.16) | 1.03<br>(0.90-1.17) | 0.980                   |
| African-Caribbeans | 3513                     | 1020 | 4533  | 0.95<br>(0.78-1.15) | 0.96<br>(0.79-1.16) | 0.89<br>(0.73-1.09) | 0.209                   |

**Model 1:** adjusted for age, sex, and ethnicity, socioeconomic position; **Model 2:** model 1 plus physical activity, and smoking status; **Model 3:** model 2 plus BMI; z\_wSleep= standardised, composite wSleep score; P= p-values for interaction by ethnicity (ethnicity\*sleep quality exposure), alpha threshold=0.10, Europeans as the reference group

**ESM-2**—Sensitivity analysis stratified by follow-up period ( $\leq 10$  years or  $>10$  years)

| Sleep Variable                   | $\leq 10$ Years Follow-up         | $>10$ Years Follow-up             | P-value for interaction |
|----------------------------------|-----------------------------------|-----------------------------------|-------------------------|
| <b>Difficulty Falling Asleep</b> |                                   |                                   |                         |
| Model 1                          | 1.15<br>(0.72-1.82)               | 1.28<br>(0.97-1.68)               | 0.122                   |
| Model 2                          | 1.12<br>(0.70-1.78)               | 1.24<br>(0.94-1.63)               | 0.116                   |
| Model 3                          | 1.09<br>(0.68-1.75)               | 1.29<br>(0.98-1.71)               | 0.074                   |
| <b>Early Morning Waking</b>      |                                   |                                   |                         |
| Model 1                          | 0.92<br>(0.64-1.32)               | 1.19<br>(0.95-1.49)               | <b>0.005</b>            |
| Model 2                          | 0.94<br>(0.65-1.34)               | 1.22<br>(0.97-1.53)               | <b>0.004</b>            |
| Model 3                          | 0.93<br>(0.65-1.33)               | 1.18<br>(0.94-1.48)               | <b>0.004</b>            |
| <b>Waking up Tired</b>           |                                   |                                   |                         |
| Model 1                          | 1.07<br>(0.74-1.55)               | <b>0.75</b><br><b>(0.60-0.95)</b> | 0.575                   |
| Model 2                          | 1.04<br>(0.71-1.51)               | <b>0.73</b><br><b>(0.58-0.92)</b> | 0.577                   |
| Model 3                          | 1.04<br>(0.70-1.53)               | <b>0.73</b><br><b>(0.58-0.92)</b> | 0.482                   |
| <b>Snoring</b>                   |                                   |                                   |                         |
| Model 1                          | <b>1.44</b><br><b>(1.02-2.03)</b> | <b>1.25</b><br><b>(1.00-1.55)</b> | 0.282                   |
| Model 2                          | <b>1.43</b><br><b>(1.02-2.02)</b> | 1.23<br>(0.99-1.54)               | 0.272                   |
| Model 3                          | 1.22<br>(0.86-1.72)               | 1.08<br>(0.87-1.35)               | 0.265                   |

**Model 1:** adjusted for age, sex, and ethnicity, socioeconomic position; **Model 2:** model 1 plus physical activity, and smoking status; **Model 3:** model 2 plus BMI; P= p-values for interaction by follow-up period (*follow-up period\*sleep quality exposure*)

**ESM-3**—Baseline characteristics of participants lost to follow-up (LTFU or had missing covariates (N=1993) and complete cases (N=2189)

|                                        | <b>LTFU or missing covariates (N = 1993)</b> | <b>Complete cases (N = 2189)</b> | <b>P</b>  |
|----------------------------------------|----------------------------------------------|----------------------------------|-----------|
| <b>Age at Baseline</b>                 | 52.2 (6.9)                                   | 51.9 (7.0)                       | 0.073     |
| <b>Sex (Proportion male)</b>           | 1,424 (71)                                   | 1703 (78)                        | 0.001***  |
| <b>Ethnicity:</b>                      |                                              |                                  | <0.001*** |
| <b>Europeans</b>                       | 992 (50)                                     | 1,199 (55)                       |           |
| <b>South-Asians</b>                    | 639 (32)                                     | 705 (32)                         |           |
| <b>African-Caribbeans,</b>             | 362 (18)                                     | 285 (13)                         |           |
| <b>SEP (Years of education)</b>        | 10.8 (3.1)                                   | 11.3 (3.1)                       | <0.001*** |
| <b>Physical Activity Score (MJ/wk)</b> | 10.6 (7.3)                                   | 10.9 (7.0)                       | 0.243     |
| <b>Smoking Status</b>                  |                                              |                                  | 0.035*    |
| <b>Never smoker</b>                    | 1,062 (54)                                   | 1,111 (51)                       |           |
| <b>Ex-smoker</b>                       | 428 (22)                                     | 532 (24)                         |           |
| <b>Current smoker</b>                  | 493 (25)                                     | 546 (25)                         |           |
| <b>BMI</b>                             | 26.4 (4.0)                                   | 26.1 (3.9)                       | 0.002**   |

Values represent means (SDs) or n (%), BMI = body mass index, SEP= socioeconomic position. Number of missing variables for LTFU or missing covariates group: Age at baseline(n=4); SEP(n=144); Smoking Status(n=10); BMI(n=3), P = p-value from either one-way ANOVA or Pearson's chi-squared test.
